# Supplementary material for: A meta-analysis of temporal changes of response in the placebo arm of surgical randomized controlled trials: an update
Source: Springer Nature journal article supplement (doi:10.1186/s13063-017-2070-9), 2017-07-12
Supplement: MOESM1 [file 13298844]

| Study | Year                    | Country | Condition                                 | Procedure                       | Placebo intervention                            | Standard treatment                                                                                                                         | Continuous vs. non-continuous rescue medication                                 | Number of patients in the placebo arm | Blinding | Randomisation ratio    | Number of treatment visits | Number of the primary assessment visit  | Timing of the primary outcome visit [months] | cross-over                                   | Outcome    | Outcome type                                      |            |
|-------|-------------------------|---------|-------------------------------------------|---------------------------------|-------------------------------------------------|--------------------------------------------------------------------------------------------------------------------------------------------|---------------------------------------------------------------------------------|---------------------------------------|----------|------------------------|----------------------------|-----------------------------------------|----------------------------------------------|----------------------------------------------|------------|---------------------------------------------------|------------|
| 1     | Abbott et al.           | 2004    | UK                                        | Endometriosis                   | Laparoscopy + excision                          | Laparoscopy + staging                                                                                                                      | No information                                                                  | not mentioned                         | 19       | Patients and assessors | 1to1                       | single event                            | 1                                            | 6                                            | compulsory | Pain and QoL                                      | subjective |
| 2     | Arts et al.             | 2012    | Belgium                                   | Gastroesophageal Reflux Disease | Endoscopy + RF treatment                        | Endoscopy + setup but no RF                                                                                                                | Proton pump inhibitors                                                          | continuous                            | 11       | Patients and assessors | 1to1                       | single event                            | 1                                            | 3                                            | compulsory | Distensibility                                    | objective  |
| 3     | Bradley et al.          | 2002    | USA                                       | Osteoarthritis                  | Tidal irrigation                                | Saline injection sub cut. and leg manipulation                                                                                             | Analgesics and standard medication for osteoporosis                             | rescue                                | 91       | Patients and assessors | 1to1                       | single event                            | 1                                            | 12                                           | none       | Pain and function                                 | subjective |
| 4     | Buchbinder et al.       | 2009    | Australia                                 | Osteoporotic vertebral fracture | Vertebroplasty                                  | Injection of anaesthetic but not cement + cephalosporin                                                                                    |                                                                                 | continuous                            | 40       | Patients and assessors | 1to1                       | single event                            | 3                                            | 3                                            | none       | Pain                                              | subjective |
| 5     | Buryk et al.            | 2011    | USA                                       | Ankyloglossia                   | Frenotomy                                       | Sham                                                                                                                                       |                                                                                 | not mentioned                         | 28       | Patients               | 1to1                       | single event                            | 1                                            | 12 but no longer fully blinded after 1st day | optional   | Pain and function                                 | subjective |
| 6     | Castro et al.           | 2010    | USA, Canada, Netherlands, Israel, Belgium | Severe asthma                   | Bronchoscopy + radiofrequency treatment         | Bronchoscopy + placebo procedure                                                                                                           | Asthma medication                                                               | continuous                            | 98       | Patients and assessors | 2to1                       | single event                            | 2                                            | 6                                            | none       | QoL                                               | subjective |
| 7     | Corley et al.           | 2003    | USA                                       | Gastroesophageal Reflux Disease | Endoscopy + RF treatment                        | Endoscopy + setup but no RF delivery                                                                                                       | Antacids for 21 days then asked to discontinue but allowed as rescue medication | encouraged to discontinue             | 29       | Patients and assessors | 1to1                       | single event                            | 1                                            | 6                                            | optional   | Symptoms and QoL                                  | subjective |
| 8     | Dowson et al.           | 2008    | UK                                        | Migraine                        | Patent foramen ovale closure with an implant    | Skin incision in the groin + transesophageal US + aspirin and clopidogrel - no heparin                                                     | Prophylactic medication for 90 days (aspirin+clopidogrel)                       | encouraged to discontinue             | 73       | Patients and assessors | 1to1                       | single event                            | 1                                            | 9                                            | none       | Pain frequency                                    | subjective |
| 9     | Eid et al.              | 2014    | USA                                       | Obesity                         | Endoscopy + gastroplication (Stomaphyx)         | Endoscopy                                                                                                                                  |                                                                                 | not mentioned                         | 31       | Patients               | 2to1                       | single event                            | 5                                            | 12                                           | none       | Weight loss                                       | objective  |
| 10    | Fockens et al.          | 2010    | USA, Netherlands                          | Gastroesophageal Reflux Disease | Endoscopy + Gatekeeper prosthesis               | Endoscopy + saline instead of prosthesis and instead of antibiotics                                                                        | PPI for 2weeks then asked to discontinue                                        | encouraged to discontinue             | 43       | Patients               | 2to1                       | resham at 3mo                           | 1                                            | 6                                            | optional   | AEs and heartburn symptoms from QoL questionnaire | subjective |
| 11    | Freed et al.            | 2001    | USA                                       | Parkinson's disease             | Cell transplantation                            | Incomplete trepanation (dura intact) + PET + MRI + phenytoin - sham-transplantation                                                        | Antiparkinsonian drugs                                                          | continuous                            | 20       | Patients and assessors | 1to1                       | single event                            | 3                                            | 12                                           | optional   | Parkinsonism (UPDRS is secondary)                 | assessed   |
| 12    | Freeman et al.          | 2005    | Australia                                 | Chronic discogenic pain         | Electrothermal therapy                          | Catheter inserted but not connected + cephazolin + CT                                                                                      | Rehabilitation and analgesics                                                   | continuous                            | 19       | Patients and assessors | 2to1                       | single event                            | 1                                            | 6                                            | none       | LBOS, SF-36, Pain and function                    | subjective |
| 13    | Friedman et al.         | 2008    | USA                                       | Sleep apnea                     | Palatal implant                                 | Identical implementation device without an implant + a-biotics                                                                             | Prophylactic antibiotics and analgesics                                         | postop                                | 31       | Patients and assessors | 1to1                       | single event                            | 1                                            | 3                                            | optional   | AHI                                               | objective  |
| 14    | Genco et al.            | 2006    | Italy                                     | Obesity                         | Endoscopy + balloon                             | Endoscopy but not balloon + diet??                                                                                                         | Omeprazole and diet                                                             | continuous                            | 16       | Patients and assessors | 1to1                       | period of time                          | 1                                            | 3                                            | compulsory | Weight loss                                       | objective  |
| 15    | Gillespie et al.        | 2010    | USA                                       | Sleep apnea                     | Palatal Implant                                 | Identical implementation device without an implant                                                                                         | No information                                                                  | not mentioned                         | 25       | Patients and assessors | 1to1                       | single event                            | 1                                            | 1.5                                          | optional   | CPAP pressure                                     | objective  |
| 16    | Gross et al.            | 2011    | USA, Germany                              | Parkinson's disease             | Cell transplantation                            | Scalp incisions and partial-thickness burr holes + MRI - the same duration                                                                 | Levodopa                                                                        | continuous                            | 36       | Patients and assessors | 1to1                       | single event                            | 1                                            | 12                                           | none       | Off-state motor UPDRS score                       | assessed   |
| 17    | Guyuron et al.          | 2009    | USA                                       | Migraine                        | "Deactivation" of trigger points                | Exposure of muscles and nerves without changing their integrity                                                                            |                                                                                 | not mentioned                         | 26       | Patients and assessors | 2to1                       | single event                            | 1                                            | 12                                           | optional   | Pain frequency                                    | subjective |
| 18    | Holmlund et al.         | 2014    | Sweden                                    | Snoring                         | Radiofrequency treatment                        | Setup but no energy delivery                                                                                                               | Post-op analgesia                                                               | postop                                | 15       | Patients and assessors | 1to1                       | up to 3 treatments at 4-6week intervals | 1                                            | 12                                           | none       | ESS                                               | subjective |
| 19    | Hurwitz et al.          | 2014    | USA, Canada, Israel, Italy, Russia        | Cancer                          | Sonication                                      | Setup but no energy delivery                                                                                                               | Analgesics                                                                      | continuous                            | 35       | Patients               | 3to1                       | single event                            | 7                                            | 3                                            | optional   | Response (pain and medication)                    | subjective |
| 20    | Kallmes et al.          | 2009    | USA, UK, Australia                        | Osteoporotic vertebral fracture | Vertebroplasty                                  | Simulated (audio, sensory, even smell) vertebroplasty - injection of anaesthetic but not cement                                            | Analgesics                                                                      | rescue                                | 63       | Patients and assessors | 1to1                       | single event                            | 3                                            | 1                                            | optional   | Disability and pain                               | subjective |
| 21    | Kapural et al.          | 2013    | USA                                       | Chronic discogenic pain         | Radiofrequency treatment                        | No energy delivery                                                                                                                         | Back braces, analgesics, muscle relaxants                                       | rescue                                | 30       | Patients and assessors | 1to1                       | single event                            | 3                                            | 6                                            | optional   | Physical function using SF-36 questionnaire       | subjective |
| 22    | Koutsourelakis et al.   | 2008    | Greece                                    | Sleep apnea                     | Septoplasty                                     | Simulated resection with manipulation of instruments - the same amount of time                                                             | No information                                                                  | not mentioned                         | 22       | Patients and assessors | 1to1                       | single event                            | 1                                            | 3.5                                          | optional   | AHI                                               | objective  |
| 23    | Kvarstein et al.        | 2009    | Norway                                    | Lower back pain                 | Radiofrequency treatment                        | Sham                                                                                                                                       | Analgesics                                                                      | rescue                                | 10       | Patients and assessors | 1to1                       | single event                            | 2                                            | 12                                           | none       | Pain                                              | subjective |
| 24    | Landorf et al.          | 2013    | Australia                                 | Plantar callus                  | Real scalpel callus debridement                 | Sham scalpel callus debridement                                                                                                            | No information beyond "usual care"                                              | not mentioned                         | 39       | Patients and assessors | 1to1                       | single event                            | 7                                            | 1.5                                          | none       | Pain                                              | subjective |
| 25    | Larson et al.           | 1998    | USA                                       | Prostatic hyperplasia           | Thermoablation                                  | Setup but no energy delivery                                                                                                               | Prophylactic antibiotics and analgesics                                         | postop                                | 42       | Patients and assessors | 3to1                       | single event                            | 3                                            | 6                                            | optional   | AUA Score, Qmax, postvoid residual, QoL           | subjective |
| 26    | Leon et al.             | 2005    | USA                                       | Coronary disease                | Percutaneous myocardial laser revascularisation | Setup but no laser procedure                                                                                                               | Antianginal medication                                                          | continuous                            | 102      | Patients and assessors | 2to1                       | single event                            | 2                                            | 12                                           | none       | Exercise duration                                 | assessed   |
| 27    | Lopes et al.            | 2014    | Brazil                                    | Obsessive-compulsive disorder   | Gamma Ventral Capsulotomy                       | Gamma knife doors remained closed during procedure                                                                                         | Pharmacologic at standard treatment and cognitive behavioural therapy           | continuous                            | 8        | Patients and assessors | 1to1                       | single event                            | 1                                            | 12                                           | optional   | Y-BOCS                                            | subjective |
| 28    | Martinez-Brocca et al.  | 2007    | Spain                                     | Obesity                         | Endoscopy + balloon                             | Endoscopy                                                                                                                                  | Proton pump inhibitors and diet                                                 | continuous                            | 11       | Patients and assessors | 1to1                       | period of time                          | 2                                            | 4                                            | none       | Weight-loss                                       | objective  |
| 29    | Masur et al.            | 2012    | Germany                                   | Sleep apnea                     | Palatal implant                                 | Identical implementation device without an implant                                                                                         | No information                                                                  | not mentioned                         | 11       | Patients and assessors | 1to1                       | single event                            | 1                                            | 1.5                                          | none       | AHI                                               | objective  |
| 30    | McVary et al.           | 2014    | USA, Australia                            | Prostatic hyperplasia           | Prostatic Urinary Lift                          | Rigid cystoscopy                                                                                                                           | Phosphodiesterase inhibitors                                                    | continuous                            | 66       | Patients and assessors | 2to1                       | single event                            | 1                                            | 3                                            | optional   | PUL voiding symptoms (IPSS)                       | subjective |
| 31    | Moseley et al.          | 2002    | USA                                       | Osteoarthritis                  | Arthroscopy + debridement OR lavage             | Skin incision without arthroscopy                                                                                                          | Walking aids, exercise, analgesics                                              | continuous                            | 60       | Patients and assessors | 2to1                       | single event                            | 7                                            | 24                                           | none       | Pain                                              | subjective |
| 32    | Navada-Castaneda et al. | 2003    | Mexico                                    | Dry eye                         | Lacrimal occlusion with collagen plug           | Sham procedure without a plug                                                                                                              | Artificial tears                                                                | continuous                            | 30       | Patients and assessors | 1to1                       | single event                            | 4                                            | 2                                            | none       | Conjunctivitis symptom score                      | subjective |
| 33    | Nease et al.            | 2004    | USA                                       | Turbinate hypertrophy           | Radiofrequency treatment                        | Sham                                                                                                                                       | Analgesics                                                                      | postop                                | 16       | Patients               | 1to1                       | single event                            | 1                                            | 6 but cross over at 8weeks                   | optional   | VAS obstruction                                   | subjective |
| 34    | Olanow et al.           | 2003    | USA                                       | Parkinson's disease             | Tissue/cells transplantation                    | Partial burr holes + a-biotics + cyclosporine + PET                                                                                        | Antiparkinsonian drugs                                                          | continuous                            | 11       | Patients and assessors | 2to1                       | single event                            | 9                                            | 24                                           | optional   | UPDRS                                             | assessed   |
| 35    | Paauw et al.            | 2004    | USA                                       | Chronic discogenic pain         | Intradiscal electrothermal therapy              | Introducing a needle onto the disc (visual and auditory feedback)+discography + CT + prophylactic a-biotics + analgesics + rehabilitation. | Post-op analgesia, exercise, rehabilitation                                     | continuous                            | 27       | Patients and assessors | 1to1                       | single event                            | 1                                            | 6                                            | none       | Pain, disability, SF-36, QoL                      | subjective |
| 36    | Powell et al.           | 2001    | USA                                       | Turbinate hypertrophy           | Radiofrequency treatment                        | Setup but no energy delivery                                                                                                               | Analgesics                                                                      | rescue                                | 5        | Patients and assessors | 3to1                       | single event                            | 1                                            | 1                                            | none       | Nasal obstruction VAS                             | assessed   |
| 37    | Rodriguez et al.        | 2009    | Chile                                     | Diabetes mellitus type 2        | Endoscopy + bypass liner                        | Endoscopy + no device                                                                                                                      | Diet, metformin, sulfonylurea                                                   | continuous                            | 6        | Patients               | 3to1                       | period of time                          | 2                                            | 6                                            | none       | HbA1                                              | objective  |
| 38    | Roehrborn et al.        | 2013    | USA, Australia, Canada                    | Prostatic hyperplasia           | Cystoscopy + prostatic urethral lift implant    | Cystoscopy + simulated procedure                                                                                                           | No information                                                                  | not mentioned                         | 66       | Patients and assessors | 2to1                       | single event                            | 3                                            | 3                                            | optional   | AUASI                                             | subjective |
| 39    | Rothstein et al.        | 2007    | USA, Germany, Belgium                     | Gastroesophageal Reflux Disease | Endoscopy + plication                           | Endoscopy + setup but device not activated                                                                                                 | antacids reduce and discontinue after 1 week                                    | encouraged to discontinue             | 72       | Patients               | 1to1                       | single event                            | 1                                            | 3                                            | optional   | QoL                                               | subjective |
| 40    | Schwartz et al.         | 2007    | Netherlands                               | Gastroesophageal Reflux Disease | Endoscopy + EndoCinch plication                 | Endoscopy + setup without needle and thread loaded                                                                                         | Proton pump inhibitors and asked to discontinue after 1 week                    | encouraged to discontinue             | 20       | Patients and assessors | 1to1to1                    | single event                            | 1                                            | 3                                            | optional   | Heartburn frequency                               | subjective |
| 41    | Sihvonen et al.         | 2013    | Finland                                   | Degenerative meniscus tear      | Arthroscopic partial meniscectomy               | Arthroscopy and sham                                                                                                                       | Analgesics and exercise                                                         | rescue                                | 76       | Patients and assessors | 1to1                       | single event                            | 3                                            | 12                                           | optional   | Pain and function                                 | subjective |
| 42    | Silverberg et al.       | 2008    | USA                                       | Alzheimer's disease             | Ventriculoperitoneal shunt                      | Identical shunt but occluded                                                                                                               | Antidementia medication                                                         | continuous                            | 88       | Patients and assessors | 1to1                       | period of time                          | 1                                            | 9                                            | optional   | Demerlia Ratings Scale                            | assessed   |
| 43    | Siproudhis et al.       | 2007    | France                                    | Faecal incontinence             | Elastomer implants                              | Saline injection                                                                                                                           | Metronidazole and paracetamol                                                   | postop                                | 22       | Patients and assessors | 1to1                       | single event                            | 1                                            | 3                                            | none       | Success of treatment measured with CC FI          | subjective |
| 44    | Stuck et al.            | 2005    | Germany                                   | Snoring                         | Radiofrequency treatment                        | Device was inserted but not activated                                                                                                      | No medication                                                                   | no meds                               | 13       | Patients and assessors | 1to1                       | 2 sessions 4-6weeks apart               | 1                                            | 3                                            | none       | VAS snoring and ESS                               | assessed   |
| 45    | Swank et al.            | 2003    | Netherlands                               | Abdominal pain                  | Laparoscopy + adhesiolysis                      | Laparoscopy                                                                                                                                | Analgesics                                                                      | rescue                                | 48       | Patients and assessors | 1to1                       | single event                            | 3                                            | 12                                           | optional   | Pain and QoL (pain)                               | subjective |
| 46    | Thompson et al.         | 2013    | USA                                       | Obesity                         | Endoscopy + outlet reduction                    | Sham                                                                                                                                       | Diet                                                                            | continuous                            | 27       | Patients and assessors | 1to1                       | single event                            | 3                                            | 6                                            | none       | Weight loss                                       | objective  |
| 47    | Wood et al.             | 2014    | USA                                       | Emphysema                       | Bronchoscopy + valve                            | Bronchoscopy + no valve                                                                                                                    | Medical management                                                              | continuous                            | 135      | Patients and assessors | 1to1                       | single event                            | 3                                            | 6                                            | none       | QoL                                               | subjective |
